# Supplementary material for: Facile preparation of V2C@VOx nanosheets with excellent multi-enzyme activity and their colorimetric sensing application
Source: Royal Society of Chemistry journal article supplement (doi:10.1039/d3nj05355e), 2024-01-01
Supplement: d3nj05355e1.pdf [file d3nj05355e1.pdf]

**Facile preparation of V<sub>2</sub>C@VO<sub>x</sub> nanosheets with excellent multi-enzyme activity and their colorimetric sensing application**

Haiyan Wang<sup>a,b,c\*</sup>, Cheng Liu<sup>b</sup>, Yue Zhao<sup>b</sup>, Xinyu Luo<sup>b</sup>, Pengjie Yin<sup>b</sup>, Fuyou Du<sup>b\*</sup>  
and Guangsheng Zeng<sup>a,b,c\*</sup>

*<sup>a</sup> Hunan Engineering Research Center of Research and Development of Degradable Materials and Molding Technology, Changsha University, 410022, China*

*<sup>b</sup> College of Biological and Chemical Engineering, Changsha University, Changsha 410022, China*

*<sup>c</sup> Hunan Provincial engineering research center for modification and processing of low-carbon degradable materials, Changsha University, 410022, China*

\* Corresponding author: Tel: +86-84261506; Fax: +86-731-84261382;

E-mail address: wanghaiyan@ccsu.edu.cn (Haiyan Wang), dufu2005@126.com (Fuyou Du),  
guangsheng\_zeng@126.com (Guangsheng Zeng)

**Tab. S1.** Comparison of synthesized methods of nanoenzymes.

| Nanoenzymes                                    | synthesized method    | synthesized condition                             | Ref.      |
|------------------------------------------------|-----------------------|---------------------------------------------------|-----------|
| CoPW <sub>11</sub> O <sub>39</sub>             | immersion method      | refluxed at 80 °C for 2 h                         | 1         |
| poly(ethylene glycol) diacrylate               | photolithography      | enzyme, redox mediator and photoinitiator         | 2         |
| SnFe <sub>2</sub> O <sub>4</sub> nanoparticles | hydrothermal method   | heated to 200 °C for 15 h                         | 3         |
| Co–Fe nanoparticles                            | hydrothermal method   | heated at 200 °C for 12-14 h                      | 4         |
| MOF@COF hybrid nanozymes                       | solvothermal method   | sequential growth                                 | 5         |
| Co-Fc@GOx                                      | hydrothermal reaction | sonicated for 30 min and heated at 120 °C for 3 h | 6         |
| V <sub>2</sub> C@VO <sub>x</sub> nanosheets    | hydrothermal method   | heated at 140 °C for 2 h                          | This work |

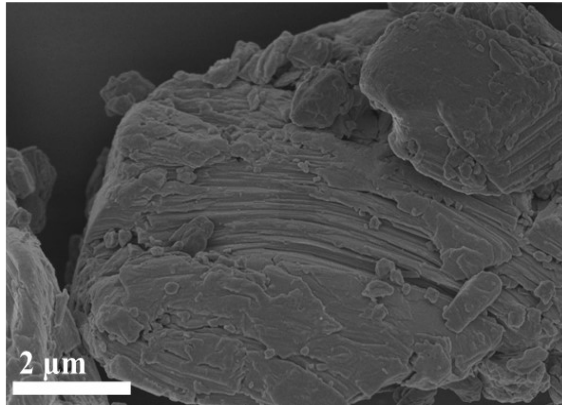

**Fig. S1.** The SEM image of V<sub>2</sub>AlC.

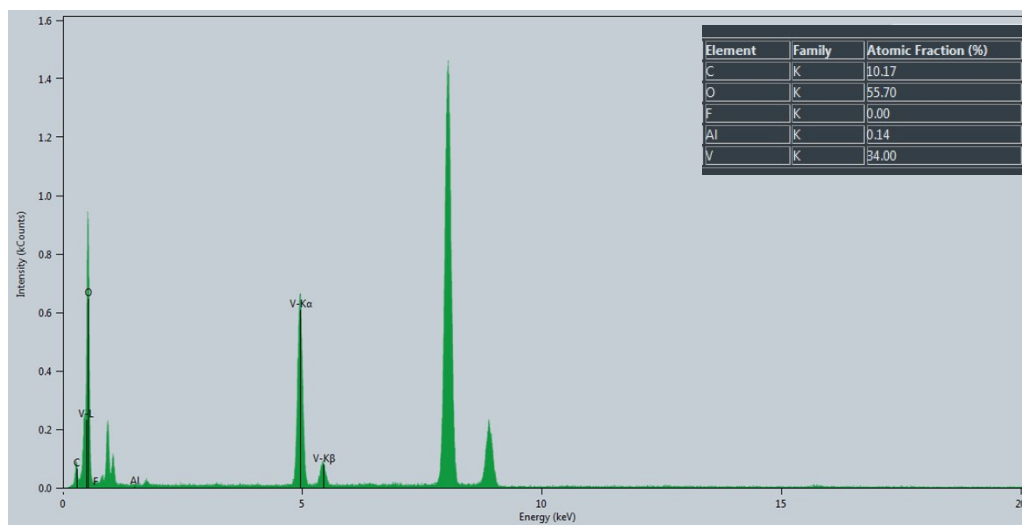

**Fig. S2.** The EDS analysis of V<sub>2</sub>C@VO<sub>x</sub> nanosheets, inset is the atomic % of C, O, Al and V.

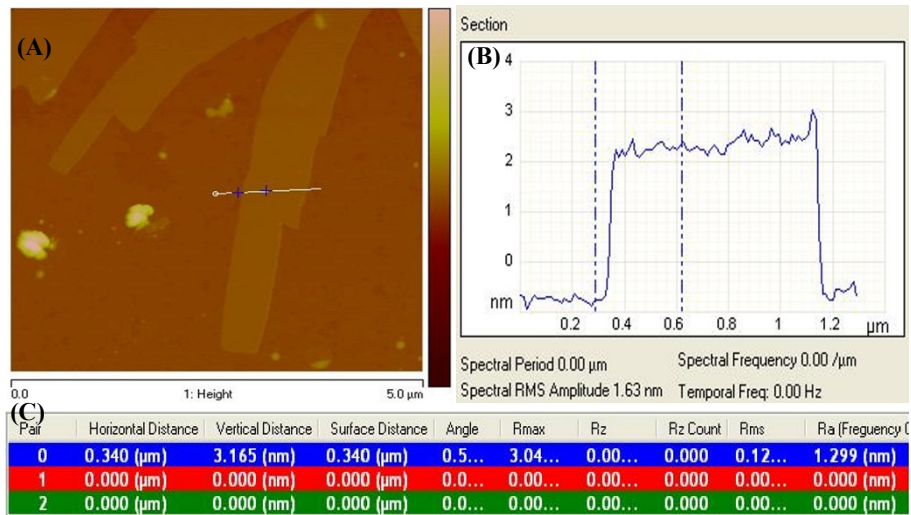

**Fig. S3.** (A) AFM image of as-synthesized  $V_2C@VO_x$  nanosheets. (B) Their corresponding height image and (C) the data of vertical distance.

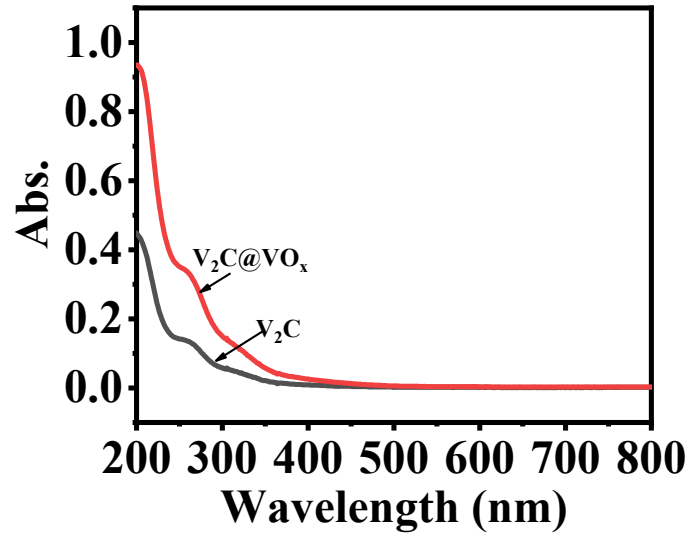

**Fig. S4.** UV-vis spectra of as-synthesized  $V_2C$  and  $V_2C@VO_x$  nanosheets solution.

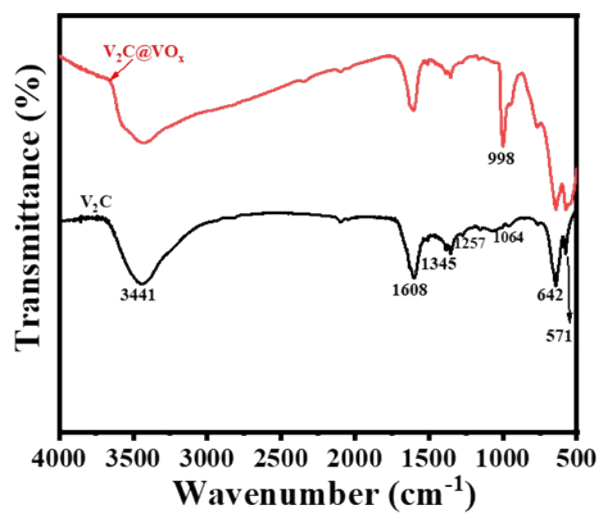

**Fig. S5.** FT-IR spectra of  $\text{V}_2\text{C}$  and  $\text{V}_2\text{C}@VO_x$  nanosheets.

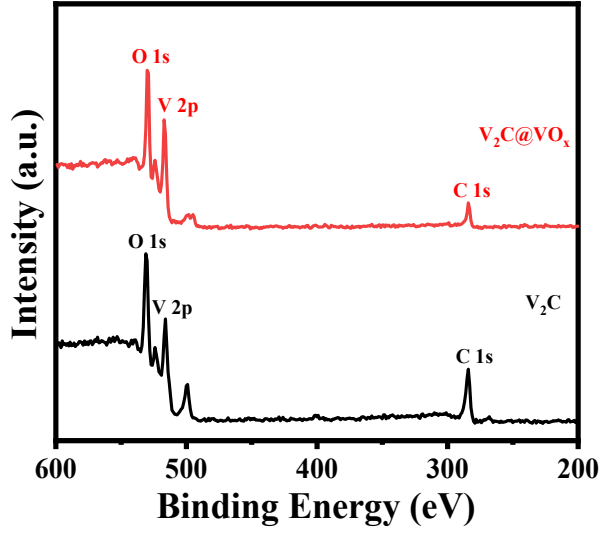

**Fig. S6.** XPS spectrum of  $V_2C$  and  $V_2C@VO_x$  nanosheets.



**Tab. S2.** Content analysis of XPS fitted peaks for V<sub>2</sub>C

|                  | C1s   | Atomic (%) | V2p                              | Atomic (%) | O1s   | Atomic (%) |
|------------------|-------|------------|----------------------------------|------------|-------|------------|
| V <sub>2</sub> C | O-C=O | 11.28 %    | V-C                              | 13.96 %    | V-C-O | 98.6 %     |
|                  | C-C   | 66.47 %    | V <sup>4+</sup> p <sub>1/2</sub> | 23.8 %     | -OH   | 1.4 %      |
|                  | C-O   | 16.6 %     | V <sup>4+</sup> p <sub>3/2</sub> | 62.24 %    |       |            |
|                  | C-V   | 5.65 %     |                                  |            |       |            |

**Tab. S3.** Content analysis of XPS fitted peaks for V<sub>2</sub>C@VO<sub>x</sub> nanosheets

|                                                | C1s   | Atomic (%) | V2p                              | Atomic (%) | O1s   | Atomic (%) |
|------------------------------------------------|-------|------------|----------------------------------|------------|-------|------------|
| V <sub>2</sub> C@VO <sub>x</sub><br>nanosheets | O-C=O | 2.55 %     | V-C                              | 6.81 %     | V-C-O | 86.06 %    |
|                                                | C-C   | 72.5 %     | V <sup>4+</sup> p <sub>1/2</sub> | 25.97 %    | -OH   | 13.94 %    |
|                                                | C-O   | 24.95 %    | V <sup>4+</sup> p <sub>3/2</sub> | 67.22 %    |       |            |

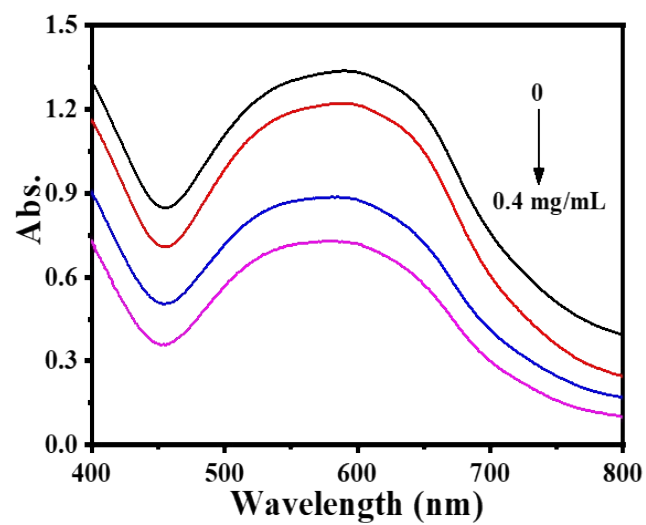

**Fig. S7.** The UV-vis spectra of NBT with different concentrations of  $V_2C@VO_x$  nanosheets.

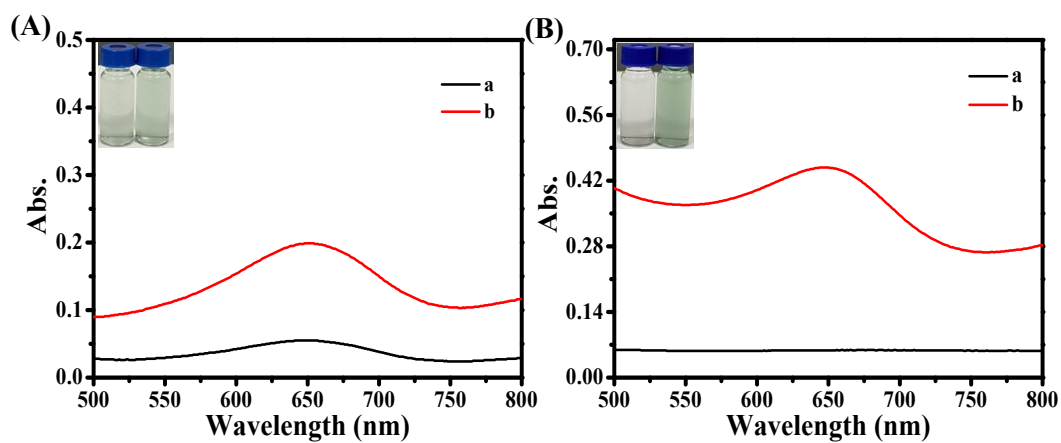

**Fig. S8.** (A) Absorption spectra of  $V_2C@VO_x$  nanosheets (0.01 mg/mL)/TMB solution under air-saturated condition (a) and  $V_2C@VO_x$  nanosheets (0.02 mg/mL)/TMB solution under air-saturated condition (b). (B) Absorption spectra of the solution containing TMB and  $V_2C@VO_x$  nanosheets under  $N_2$ -saturated condition (a) and  $O_2$ -saturated condition (b).

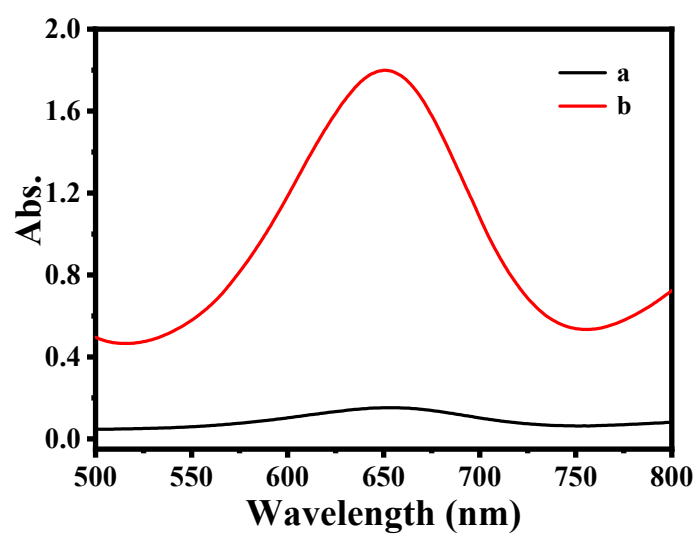

**Fig. S9.** The UV-vis spectra of (a)  $V_2C/TMB/H_2O_2$  (1.5 mM) and (b)  $V_2C@VO_x/TMB/H_2O_2$  (1.5 mM).  $[TMB]= 0.2$  mM.  $[V_2C@VO_x]=0.02$  mg/mL.  $[V_2C]=0.02$  mg/mL. The above solutions were incubated in NaAc-HAc buffer (pH 4.0, 0.2 M) at 40 °C for 5 min.

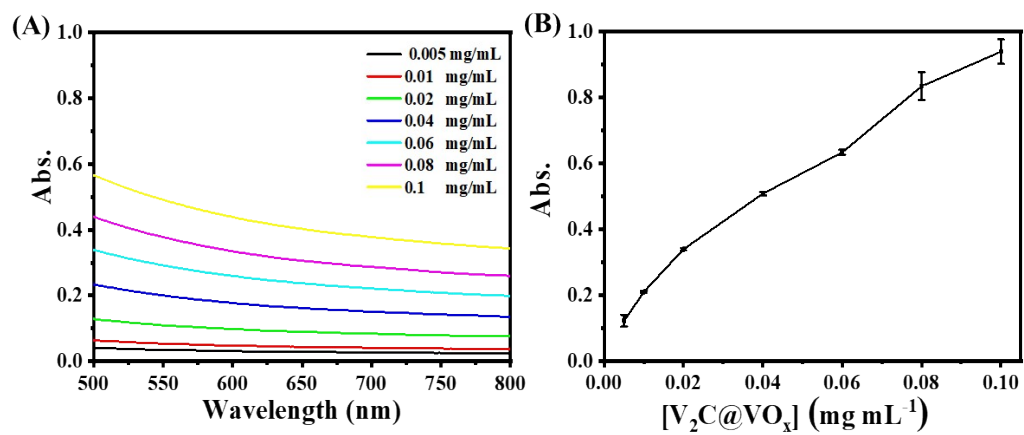

**Fig. S10.** UV-vis spectra for  $V_2C@VO_x$  nanosheets of various concentrations. The optimum  $V_2C@VO_x$  nanosheets concentration is 0.02 mg/mL for peroxidase-like activity.

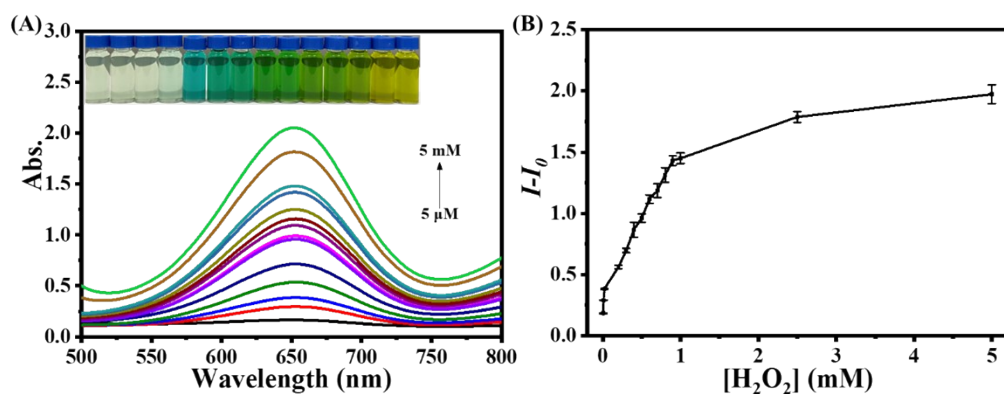

**Fig. S11.** (A) Under optimal conditions, UV-vis spectra of TMB interaction with different H<sub>2</sub>O<sub>2</sub> concentrations. The inset image shows the corresponding photograph of the solutions containing different concentrations of H<sub>2</sub>O<sub>2</sub>. (B) The linear standard curve for H<sub>2</sub>O<sub>2</sub> determination. Here,  $I_0$  and  $I$  are defined as the maximum Abs. at 652 nm without or with H<sub>2</sub>O<sub>2</sub>, respectively.

**Tab. S4.** Comparison of the performances among various sensing materials for the glucose detection through a colorimetric approach.

| Sensing materials            | Linear range ( $\mu\text{M}$ ) | LODs ( $\mu\text{M}$ ) | Ref.      |
|------------------------------|--------------------------------|------------------------|-----------|
| Microfluidic Chip            | 100-500                        | 30                     | 7         |
| $\text{Fe}_3\text{O}_4$ MNPs | 50-1000                        | 30                     | 8         |
| Au @ Ag NRs                  | 50-20000                       | 39                     | 9         |
| N-GQDs                       | 25-375                         | 16                     | 10        |
| $\text{H}_2\text{TCPP-NiO}$  | 50-500                         | 20                     | 11        |
| mesoporous ceria             | 200-1000                       | 10                     | 12        |
| $\text{V}_2\text{C@VO}_x$    | 0.1-3000                       | 0.08                   | This work |

**Tab. S5.** Determination of glucose in human serum.

| Samples | Determination ( $\mu\text{M}$ ) | Added ( $\mu\text{M}$ ) | Detected ( $\mu\text{M}$ ) | Recovery (%) | RSD (%) (n=3) |
|---------|---------------------------------|-------------------------|----------------------------|--------------|---------------|
| I       | 23.6                            | 9.00                    | 31.9                       | 97           | 1.4           |
|         |                                 | 18.00                   | 39.7                       | 91.9         | 0.8           |
|         |                                 | 27.00                   | 49.9                       | 97.3         | 1.9           |
| II      | 28.3                            | 9.00                    | 38.4                       | 104          | 4             |
|         |                                 | 18.00                   | 45.4                       | 96.8         | 3.2           |
|         |                                 | 27.00                   | 54.3                       | 96.6         | 4.9           |
| III     | 70.5                            | 9.00                    | 77.6                       | 97.3         | 4.2           |
|         |                                 | 18.00                   | 84.6                       | 99.3         | 1.3           |
|         |                                 | 27.00                   | 94                         | 95           | 3.1           |



## Reference

1. Y. He, X. Li, X. Xu, J. Pan and X. Niu, *J. Mater. Chem. B*, 2018, 6, 5750-5755.
2. A. Caliò, P. Dardano, V. Di Palma, M. F. Bevilacqua, A. Di Matteo, H. Iuele and L. De Stefano, *Sens. Actuat. B-Chem.*, 2016, 236, 343-349.
3. L. Feng, B. Liu, R. Xie, D. Wang, C. Qian, W. Zhou, J. Liu, D. Jana, P. Yang and Y. Zhao, *Adv. Funct. Mater.*, 2021, 31, 2006216.
4. D. Liu, C. Ju, C. Han, R. Shi, X. Chen, D. Duan, J. Yan and X. Yan, *Biosens. Bioelectron.*, 2021, 173, 112817.
5. L. Zhang, Z. Liu, Q. Deng, Y. Sang, K. Dong, J. Ren and X. Qu, *Angew. Chem. Int. Edit.*, 2021, 60, 3469-3474.
6. C. Fang, Z. Deng, G. Cao, Q. Chu, Y. Wu, X. Li, X. Peng and G. Han, *Adv. Funct. Mater.*, 2020, 30, 1910085.
7. J. Xiao, Y. Liu, L. Su, D. Zhao, L. Zhao and X. Zhao, *Anal. Chem.*, 2019, 91, 14803-14807.
8. L. Gao, J. Zhuang, L. Nie, J. Zhang, Y. Zhang, N. Gu, T. Wang, J. Feng, D. Yang, S. Perrett, et al. *Nat. Nanotechnol.*, 2007, 2, 577-583.
9. L. Han, C. Li, T. Zhang, Q. Lang and A. Liu, *ACS. Appl. Mater. Inter.*, 2015, 7, 14463-14470.
10. L. Lin, X. Song, Y. Chen, M. Rong, T. Zhao, Y. Wang, Y. Jiang and X. Chen, *Anal. Chim. Acta.*, 2015, 869, 89-95.
11. Q. Liu, Y. Yang, H. Li, R. Zhu, Q. Shao, S. Yang and J. Xu, *Biosens. Bioelectron.*, 2015, 64, 147-153.
12. M. S. Kim, J. Lee, H. T. Ahn, M. L. Kim and J. Lee, *Nanoscale*, 2020, 12, 1419-1424.
